# Supplementary material for: MicroRNA Signatures of Colonic Polyps on Screening and Histology
Source: Oxford University Press journal article supplement (doi:10.1158/1940-6207.capr-16-0086), 2016-09-23
Supplement: 19406207capr160086-sup-164385_1_supp_3601782_nnzgg3.docx [file 19406207capr160086-sup-164385_1_supp_3601782_nnzgg3.docx]

**Supplemental Table 3: Mean and standard deviation of log2 signal values of 99 differentially expressed miRs.**

These miRNA probes were significantly different at least one of five histology groups (histology FDR *P*-value < 0.05).

|  | **HPNM (N=23)** | | **TA (N=26)** | | **SSA (N=13)** | | **TSA (N=11)** | | **TVHG (N=40)** | |  |
| --- | --- | --- | --- | --- | --- | --- | --- | --- | --- | --- | --- |
| **MIR PROBE SET NAME** | **MEAN** | **SD** | **MEAN** | **SD** | **MEAN** | **SD** | **MEAN** | **SD** | **MEAN** | **SD** | **FDR P VALUE** |
| **hsamiR145_st** | 6.07 | 1.08 | 5.49 | 1.09 | 6.28 | 1.10 | 4.21 | 1.72 | 3.12 | 1.49 | 0.0000 |
| **hsamiR143_st** | 6.16 | 1.01 | 5.87 | 0.98 | 6.83 | 0.67 | 4.80 | 1.58 | 3.78 | 1.63 | 0.0000 |
| **hsalet7e_st** | 5.07 | 0.86 | 5.06 | 0.77 | 5.32 | 0.81 | 4.13 | 1.54 | 3.12 | 1.32 | 0.0000 |
| **hsamiR195_st** | 4.14 | 0.97 | 3.47 | 0.90 | 3.95 | 1.10 | 2.59 | 0.75 | 2.49 | 0.80 | 0.0000 |
| **hsamiR199a3p_st** | 3.72 | 0.71 | 3.47 | 0.66 | 3.59 | 0.90 | 2.54 | 0.68 | 2.53 | 0.61 | 0.0000 |
| **hsamiR215_st** | 4.51 | 0.77 | 3.55 | 0.83 | 4.46 | 0.85 | 3.45 | 1.13 | 3.08 | 0.85 | 0.0000 |
| **hsamiR222_st** | 4.62 | 1.00 | 4.39 | 0.91 | 5.46 | 0.63 | 4.51 | 1.96 | 3.06 | 1.35 | 0.0000 |
| **hsamiR26a_st** | 7.81 | 0.81 | 7.48 | 1.10 | 7.54 | 0.71 | 6.36 | 2.32 | 5.09 | 2.49 | 0.0000 |
| **hsalet7d_st** | 6.10 | 0.76 | 6.23 | 0.76 | 6.12 | 0.86 | 5.32 | 1.72 | 4.32 | 1.73 | 0.0000 |
| **hsamiR126_st** | 4.02 | 1.00 | 3.89 | 0.97 | 3.80 | 0.95 | 3.07 | 0.52 | 2.72 | 0.91 | 0.0000 |
| **hsalet7i_st** | 4.61 | 0.71 | 4.58 | 0.69 | 4.53 | 0.70 | 3.56 | 1.18 | 3.47 | 1.05 | 0.0000 |
| **hsamiR23b_st** | 6.55 | 1.01 | 6.74 | 1.08 | 6.67 | 0.86 | 5.50 | 2.30 | 4.38 | 2.31 | 0.0000 |
| **hsamiR194_st** | 8.24 | 0.96 | 8.07 | 1.31 | 8.13 | 0.54 | 6.54 | 3.06 | 5.54 | 2.69 | 0.0000 |
| **hsalet7a_st** | 7.28 | 0.76 | 7.14 | 0.94 | 7.17 | 0.60 | 5.81 | 2.25 | 5.20 | 2.16 | 0.0000 |
| **hsamiR100_st** | 2.97 | 0.56 | 2.64 | 0.49 | 2.76 | 0.60 | 2.22 | 0.23 | 2.33 | 0.34 | 0.0000 |
| **hsamiR107_st** | 6.61 | 0.92 | 6.62 | 1.07 | 6.45 | 0.80 | 5.64 | 2.35 | 4.44 | 2.26 | 0.0000 |
| **hsamiR16_st** | 6.38 | 0.93 | 6.47 | 1.04 | 6.45 | 0.69 | 5.22 | 1.96 | 4.65 | 1.79 | 0.0000 |
| **hsamiR3373p_st** | 2.66 | 0.18 | 2.68 | 0.21 | 2.76 | 0.41 | 3.09 | 0.62 | 3.22 | 0.57 | 0.0001 |
| **hsamiR214_st** | 4.72 | 0.75 | 4.43 | 0.40 | 4.92 | 0.87 | 4.67 | 0.47 | 3.95 | 0.61 | 0.0001 |
| **hsamiR150_st** | 3.45 | 0.84 | 3.14 | 0.70 | 3.04 | 0.77 | 2.53 | 0.51 | 2.52 | 0.55 | 0.0001 |
| **hsamiR24_st** | 7.32 | 0.76 | 7.45 | 1.18 | 7.61 | 0.49 | 6.22 | 2.80 | 5.19 | 2.55 | 0.0002 |
| **hsamiR199b3p_st** | 3.68 | 0.84 | 3.30 | 0.79 | 3.73 | 0.96 | 2.82 | 0.83 | 2.70 | 0.66 | 0.0002 |
| **hsamiR192_st** | 7.36 | 0.71 | 7.23 | 0.80 | 7.29 | 0.45 | 6.24 | 2.25 | 5.52 | 2.09 | 0.0003 |
| **hsamiR23a_st** | 5.93 | 0.92 | 6.15 | 0.93 | 6.13 | 0.97 | 5.03 | 2.38 | 4.21 | 2.11 | 0.0004 |
| **hsamiR22_st** | 3.82 | 0.96 | 3.45 | 0.88 | 4.19 | 0.98 | 3.63 | 1.35 | 2.77 | 0.85 | 0.0005 |
| **hsamiR320a_st** | 7.47 | 0.51 | 7.42 | 0.87 | 7.94 | 0.34 | 8.09 | 0.61 | 8.25 | 0.78 | 0.0006 |
| **hsamiR494_st** | 4.75 | 0.75 | 4.84 | 0.78 | 4.89 | 0.64 | 3.84 | 1.28 | 3.77 | 1.21 | 0.0008 |
| **hsamiR1268_st** | 6.12 | 0.84 | 6.08 | 0.87 | 6.46 | 0.84 | 6.91 | 1.06 | 7.14 | 0.97 | 0.0008 |
| **hsamiR146b5p_st** | 2.53 | 0.45 | 2.17 | 0.38 | 2.42 | 0.31 | 2.10 | 0.29 | 2.06 | 0.34 | 0.0008 |
| **hsamiR1403p_st** | 3.79 | 1.00 | 3.63 | 0.68 | 3.31 | 0.91 | 3.07 | 0.94 | 2.70 | 0.92 | 0.0010 |
| **hsamiR155_st** | 4.16 | 1.00 | 3.84 | 0.82 | 3.86 | 0.90 | 3.44 | 1.12 | 2.89 | 1.14 | 0.0010 |
| **hsamiR191_st** | 6.47 | 0.90 | 6.66 | 0.91 | 6.36 | 0.53 | 5.44 | 2.28 | 4.88 | 2.05 | 0.0013 |
| **hsamiR199a5p_st** | 2.82 | 0.59 | 2.52 | 0.50 | 2.81 | 0.67 | 2.39 | 0.44 | 2.22 | 0.38 | 0.0014 |
| **hsamiR1249_st** | 2.79 | 0.37 | 2.87 | 0.35 | 3.02 | 0.40 | 2.86 | 0.63 | 3.43 | 0.76 | 0.0020 |
| **hsamiR1252_st** | 1.88 | 0.12 | 1.83 | 0.09 | 1.97 | 0.20 | 2.06 | 0.20 | 1.88 | 0.12 | 0.0021 |
| **hsamiR221_st** | 4.50 | 0.94 | 4.46 | 0.86 | 5.01 | 0.99 | 4.53 | 1.77 | 3.35 | 1.47 | 0.0021 |
| **hsamiR3615p_st** | 3.97 | 0.85 | 4.03 | 0.68 | 3.70 | 1.03 | 3.12 | 1.02 | 3.02 | 1.11 | 0.0024 |
| **hsamiR20a_st** | 5.24 | 0.89 | 5.58 | 1.00 | 5.30 | 0.84 | 4.27 | 1.81 | 3.95 | 1.89 | 0.0024 |
| **hsalet7c_st** | 6.78 | 0.50 | 6.45 | 0.79 | 6.63 | 0.52 | 5.73 | 1.80 | 5.48 | 1.56 | 0.0039 |
| **hsamiR50935p_st** | 1.91 | 0.21 | 1.86 | 0.14 | 1.99 | 0.33 | 2.29 | 0.40 | 2.02 | 0.25 | 0.0039 |
| **hsamiR106a_st** | 5.27 | 1.01 | 5.78 | 0.84 | 5.52 | 0.83 | 4.58 | 1.82 | 4.14 | 1.88 | 0.0039 |
| **hsamiR663b_st** | 2.54 | 0.54 | 2.85 | 0.56 | 3.01 | 0.49 | 3.03 | 1.17 | 3.59 | 1.22 | 0.0045 |
| **hsamiR2182star_st** | 1.93 | 0.17 | 1.90 | 0.12 | 1.88 | 0.17 | 2.13 | 0.29 | 2.08 | 0.25 | 0.0049 |
| **hsamiR1237_st** | 2.71 | 0.38 | 2.72 | 0.40 | 2.84 | 0.40 | 3.23 | 0.80 | 3.24 | 0.66 | 0.0053 |
| **hsamiR1324_st** | 1.90 | 0.11 | 1.92 | 0.14 | 2.04 | 0.27 | 2.20 | 0.45 | 2.15 | 0.31 | 0.0057 |
| **hsamiR17_st** | 5.59 | 0.96 | 6.02 | 0.95 | 5.77 | 0.78 | 4.71 | 2.11 | 4.37 | 1.98 | 0.0057 |
| **hsamiR301a_st** | 1.85 | 0.09 | 1.89 | 0.16 | 1.97 | 0.24 | 2.17 | 0.33 | 1.94 | 0.19 | 0.0060 |
| **hsalet7gstar_st** | 1.89 | 0.16 | 1.89 | 0.12 | 1.94 | 0.29 | 2.27 | 0.51 | 1.97 | 0.22 | 0.0077 |
| **hsamiR378_st** | 5.55 | 0.74 | 5.52 | 0.80 | 5.26 | 0.85 | 4.78 | 1.43 | 4.42 | 1.48 | 0.0078 |
| **hsamiR548i_st** | 1.94 | 0.19 | 1.87 | 0.12 | 2.01 | 0.17 | 2.22 | 0.34 | 2.04 | 0.28 | 0.0082 |
| **hsamiR367star_st** | 1.86 | 0.15 | 1.85 | 0.17 | 1.92 | 0.22 | 2.25 | 0.60 | 1.94 | 0.21 | 0.0097 |
| **hsamiR1275_st** | 4.37 | 0.72 | 4.36 | 0.57 | 4.61 | 0.58 | 5.18 | 1.09 | 5.06 | 0.92 | 0.0119 |
| **hsamiR548o_st** | 1.85 | 0.09 | 1.82 | 0.09 | 1.97 | 0.17 | 1.91 | 0.15 | 2.01 | 0.26 | 0.0123 |
| **hsamiR320b_st** | 7.12 | 0.49 | 7.14 | 1.00 | 7.61 | 0.34 | 7.75 | 0.69 | 7.84 | 0.84 | 0.0124 |
| **hsamiR335_st** | 4.25 | 0.98 | 4.17 | 1.00 | 3.26 | 1.14 | 2.80 | 1.01 | 4.06 | 1.30 | 0.0124 |
| **hsamiR92b_st** | 2.21 | 0.31 | 2.25 | 0.25 | 2.11 | 0.16 | 2.74 | 0.85 | 2.26 | 0.31 | 0.0124 |
| **hsamiR1263_st** | 1.95 | 0.14 | 2.00 | 0.17 | 1.97 | 0.17 | 2.14 | 0.30 | 1.91 | 0.14 | 0.0158 |
| **hsamiR1234_st** | 3.66 | 0.43 | 3.63 | 0.41 | 3.74 | 0.69 | 4.08 | 0.88 | 4.30 | 0.93 | 0.0168 |
| **hsamiR196astar_st** | 2.04 | 0.17 | 2.11 | 0.26 | 2.02 | 0.17 | 2.33 | 0.48 | 2.31 | 0.36 | 0.0168 |
| **hsamiR373star_st** | 2.01 | 0.30 | 2.17 | 0.25 | 2.02 | 0.17 | 2.50 | 0.56 | 2.14 | 0.34 | 0.0168 |
| **hsamiR608_st** | 1.98 | 0.15 | 2.02 | 0.22 | 2.04 | 0.17 | 2.29 | 0.24 | 2.20 | 0.36 | 0.0168 |
| **hsamiR941_st** | 1.84 | 0.14 | 1.93 | 0.20 | 1.87 | 0.13 | 2.08 | 0.39 | 2.11 | 0.34 | 0.0168 |
| **hsamiR1279_st** | 1.84 | 0.08 | 1.89 | 0.16 | 1.88 | 0.12 | 1.98 | 0.19 | 1.99 | 0.19 | 0.0169 |
| **hsamiR155star_st** | 1.89 | 0.17 | 1.88 | 0.10 | 1.89 | 0.20 | 1.86 | 0.15 | 2.10 | 0.38 | 0.0175 |
| **hsamiR125b_st** | 4.12 | 0.66 | 3.68 | 0.69 | 3.91 | 0.72 | 2.72 | 0.74 | 3.67 | 1.15 | 0.0201 |
| **hsamiR552_st** | 1.92 | 0.12 | 2.03 | 0.23 | 2.14 | 0.37 | 2.29 | 0.53 | 2.17 | 0.28 | 0.0205 |
| **hsamiR558_st** | 2.15 | 0.37 | 2.06 | 0.26 | 2.28 | 0.40 | 2.01 | 0.16 | 2.37 | 0.49 | 0.0205 |
| **hsamiR6715p_st** | 2.74 | 0.44 | 2.89 | 0.33 | 2.98 | 0.37 | 3.02 | 0.68 | 3.41 | 0.95 | 0.0229 |
| **hsamiR3385p_st** | 1.94 | 0.14 | 1.98 | 0.17 | 2.16 | 0.37 | 2.27 | 0.42 | 2.19 | 0.38 | 0.0246 |
| **hsamiR497_st** | 2.39 | 0.43 | 2.25 | 0.48 | 2.61 | 0.60 | 2.22 | 0.56 | 2.06 | 0.33 | 0.0246 |
| **hsamiR518f_st** | 1.78 | 0.06 | 1.81 | 0.11 | 1.92 | 0.26 | 1.96 | 0.17 | 1.83 | 0.12 | 0.0270 |
| **hsamiR664star_st** | 2.62 | 0.38 | 3.10 | 0.55 | 2.78 | 0.57 | 2.43 | 0.72 | 2.64 | 0.52 | 0.0273 |
| **hsamiR5123p_st** | 1.86 | 0.13 | 1.85 | 0.13 | 1.91 | 0.12 | 2.08 | 0.35 | 1.91 | 0.13 | 0.0282 |
| **hsamiR15astar_st** | 1.92 | 0.21 | 1.90 | 0.14 | 1.99 | 0.20 | 2.20 | 0.28 | 2.01 | 0.24 | 0.0314 |
| **hsamiR1515p_st** | 4.29 | 1.14 | 4.28 | 0.85 | 4.06 | 1.17 | 3.87 | 1.60 | 3.16 | 1.50 | 0.0322 |
| **hsamiR1181_st** | 2.53 | 0.20 | 2.55 | 0.31 | 2.73 | 0.52 | 3.04 | 0.64 | 2.87 | 0.59 | 0.0327 |
| **hsamiR1278_st** | 1.86 | 0.09 | 1.85 | 0.10 | 1.94 | 0.18 | 2.05 | 0.26 | 1.95 | 0.18 | 0.0327 |
| **hsamiR19b_st** | 4.06 | 0.84 | 4.26 | 0.80 | 3.84 | 0.89 | 3.43 | 1.17 | 3.32 | 1.18 | 0.0327 |
| **hsamiR433_st** | 1.88 | 0.09 | 1.92 | 0.15 | 1.93 | 0.20 | 2.10 | 0.35 | 1.88 | 0.11 | 0.0327 |
| **hsamiR619_st** | 1.87 | 0.12 | 1.94 | 0.14 | 2.05 | 0.19 | 2.05 | 0.41 | 2.05 | 0.20 | 0.0327 |
| **hsamiR497star_st** | 1.87 | 0.11 | 1.98 | 0.22 | 1.92 | 0.12 | 1.96 | 0.22 | 2.13 | 0.37 | 0.0338 |
| **hsamiR5125p_st** | 1.97 | 0.19 | 1.96 | 0.14 | 1.97 | 0.21 | 2.22 | 0.33 | 2.15 | 0.34 | 0.0360 |
| **hsamiR285p_st** | 2.95 | 0.62 | 2.80 | 0.67 | 2.96 | 0.65 | 2.83 | 0.71 | 2.37 | 0.66 | 0.0391 |
| **hsamiR297_st** | 1.90 | 0.14 | 1.94 | 0.21 | 2.29 | 0.79 | 2.20 | 0.26 | 2.25 | 0.52 | 0.0391 |
| **hsamiR30a_st** | 4.52 | 0.92 | 4.27 | 0.90 | 3.81 | 1.21 | 2.90 | 1.05 | 3.89 | 1.40 | 0.0391 |
| **hsamiR410_st** | 1.93 | 0.16 | 1.92 | 0.14 | 1.99 | 0.21 | 2.19 | 0.43 | 1.93 | 0.17 | 0.0391 |
| **hsamiR93_st** | 5.21 | 0.98 | 5.70 | 0.86 | 5.47 | 0.55 | 4.86 | 1.65 | 4.39 | 1.78 | 0.0391 |
| **hsamiR519astar_st** | 1.82 | 0.10 | 1.82 | 0.12 | 1.83 | 0.07 | 2.05 | 0.43 | 1.93 | 0.21 | 0.0398 |
| **hsamiR5823p_st** | 1.98 | 0.20 | 1.99 | 0.17 | 2.13 | 0.28 | 2.31 | 0.35 | 2.13 | 0.32 | 0.0398 |
| **hsalet7g_st** | 3.78 | 0.66 | 3.59 | 0.72 | 3.44 | 0.74 | 2.93 | 0.98 | 3.05 | 0.97 | 0.0412 |
| **hsamiR381_st** | 1.90 | 0.12 | 1.87 | 0.12 | 2.08 | 0.23 | 2.03 | 0.30 | 1.98 | 0.19 | 0.0420 |
| **hsamiR141star_st** | 1.89 | 0.10 | 1.86 | 0.15 | 1.85 | 0.12 | 2.12 | 0.30 | 1.94 | 0.24 | 0.0429 |
| **hsamiR124_st** | 2.01 | 0.19 | 1.93 | 0.16 | 1.98 | 0.14 | 2.12 | 0.16 | 2.12 | 0.29 | 0.0430 |
| **hsamiR625star_st** | 2.79 | 0.33 | 2.96 | 0.34 | 2.91 | 0.50 | 2.76 | 0.84 | 3.32 | 0.77 | 0.0438 |
| **hsamiR517c_st** | 1.85 | 0.08 | 1.84 | 0.10 | 1.85 | 0.14 | 1.96 | 0.14 | 1.84 | 0.08 | 0.0442 |
| **hsamiR2965p_st** | 2.68 | 0.32 | 2.89 | 0.47 | 3.12 | 0.70 | 2.90 | 0.87 | 3.24 | 0.64 | 0.0457 |
| **hsamiR1306_st** | 1.88 | 0.17 | 1.86 | 0.13 | 1.91 | 0.19 | 2.11 | 0.30 | 1.91 | 0.18 | 0.0481 |
| **hsamiR940_st** | 2.83 | 0.35 | 3.00 | 0.41 | 2.87 | 0.47 | 2.92 | 0.75 | 3.34 | 0.71 | 0.0481 |
| **hsamiR891a_st** | 2.52 | 0.46 | 2.15 | 0.33 | 2.12 | 0.26 | 2.14 | 0.29 | 2.45 | 0.56 | 0.0481 |
