# Supplementary material for: MicroRNA Signatures of Colonic Polyps on Screening and Histology
Source: Oxford University Press journal article supplement (doi:10.1158/1940-6207.capr-16-0086), 2016-09-23
Supplement: 19406207capr160086-sup-164385_1_supp_3601783_mmzgg3.docx [file 19406207capr160086-sup-164385_1_supp_3601783_mmzgg3.docx]

**Supplemental Table 4: Logistic regression analysis of high-risk vs. low-risk groups**

| **Model** | **Predictors** | **OR** | **95% CI** | **Concordance Index** |
| --- | --- | --- | --- | --- |
| TVHG vs. HPNM | hsamiR145_st | 0.093 | (0.030, 0.289) | 0.938 |
| TVHG vs. (HPNM +TA) | hsamiR145_st | 0.056 | (0.017, 0.187) | 0.956 |
| hsamiR619_st | 7.724 | (2.420, 24.655) |
| (TVHG+TSA) vs.  (HPNM + TA + SSA/P) | hsamiR124_st | 5.589 | (1.884, 16.577) | 0.960 |
| hsamiR143_st | 0.019 | (0.004, 0.091) |
| hsamiR30a_st | 0.138 | (0.138, 0.373) |

NOTE: Binary logistic regression analysis was performed for each model using stepwise procedure with entry and removal *P-*value of 0.005. The covariates included were 99 differentially expressed miRs, polyp location, sex, family history, smoking status, and age group.
